# Supplementary material for: A comparative study of extracellular vesicle-associated and cell-free DNA and RNA for HPV detection in oropharyngeal squamous cell carcinoma
Source: PubMed Central journal article supplement (PMC7142128; doi:10.1038/s41598-020-63180-8), 2020-04-08
Supplement: 41598_2020_63180_MOESM1_ESM.pdf [file 41598_2020_63180_MOESM1_ESM.pdf]

## Supplementary data

**Study title:** A comparative study of extracellular vesicle-associated and cell-free DNA and RNA for HPV detection in oropharyngeal squamous cell carcinoma.

### Authors:

Bella Nguyen<sup>1,2</sup>, Katie Meehan<sup>2,3</sup>, Michelle R Pereira<sup>4</sup>, Bob Mirzai<sup>2,7</sup>, Si Hong Lim<sup>5</sup>, Connall Leslie<sup>6,7</sup>, Michael Clark<sup>4</sup>, Chady Sader<sup>8,9</sup>, Peter Friedland<sup>8,10,11</sup>, Andrew Lindsay<sup>12</sup>, Colin Tang<sup>4,13</sup>, Michael Millward<sup>1,14</sup>, Elin Gray<sup>4</sup>, Annette M Lim<sup>1,2,15</sup>

### Affiliations:

1. *Department of Medical Oncology, Sir Charles Gairdner Hospital, Perth, Western Australia, Australia*
2. *School of Biomedical Sciences, University of Western Australia, Perth, Western Australia, Australia*
3. *Chinese University of Hong Kong, Shatin, Hong Kong.*
4. *School of Medical and Health Sciences, Edith Cowan University, Joondalup, Western Australia, Australia*
5. *Genomics Western Australia, Telethon Kids Institute, Western Australia, Australia.*
6. *School of Pathology and Laboratory Medicine, The University of Western Australia, Perth, Western Australia, Australia*
7. *Department of Anatomical Pathology, PathWest, QEII Medical Centre, Perth, Western Australia, Australia*
8. *Department of Otolaryngology, Head and Neck Surgery, Sir Charles Gairdner Hospital, Perth, Western Australia, Australia*
9. *Department of Otolaryngology, Head and Neck Surgery, St John of God Murdoch Hospital, Perth, Western Australia, Australia*
10. *Faculty of Medical and Health Sciences, University of Western Australia, Perth, Western Australia, Australia*
11. *School of Medicine, University of Notre Dame, Fremantle, Western Australia, Australia.*
12. *Department of Otolaryngology, Head and Neck Surgery, Hollywood Private Hospital, Perth, Western Australia, Australia*
13. *Department of Radiation Oncology, Sir Charles Gairdner Hospital, Perth, Western Australia, Australia*
14. *School of Medicine, The University of Western Australia, Perth, Western Australia, Australia*
15. *Institute for Health Research, University of Notre Dame, Fremantle, Western Australia, Australia.*

### Corresponding author:

Dr Annette M Lim

Email: [Annette.Lim@health.wa.gov.au](mailto:Annette.Lim@health.wa.gov.au)

Address: Department of Medical Oncology, Sir Charles Gairdner Hospital, B Block, Hospital Ave, NEDLANDS, WA, 6009.

Telephone: (+61) 8 6457 3333; Facsimile: (+61) 8 6457 1018

## Western blot Original Gel

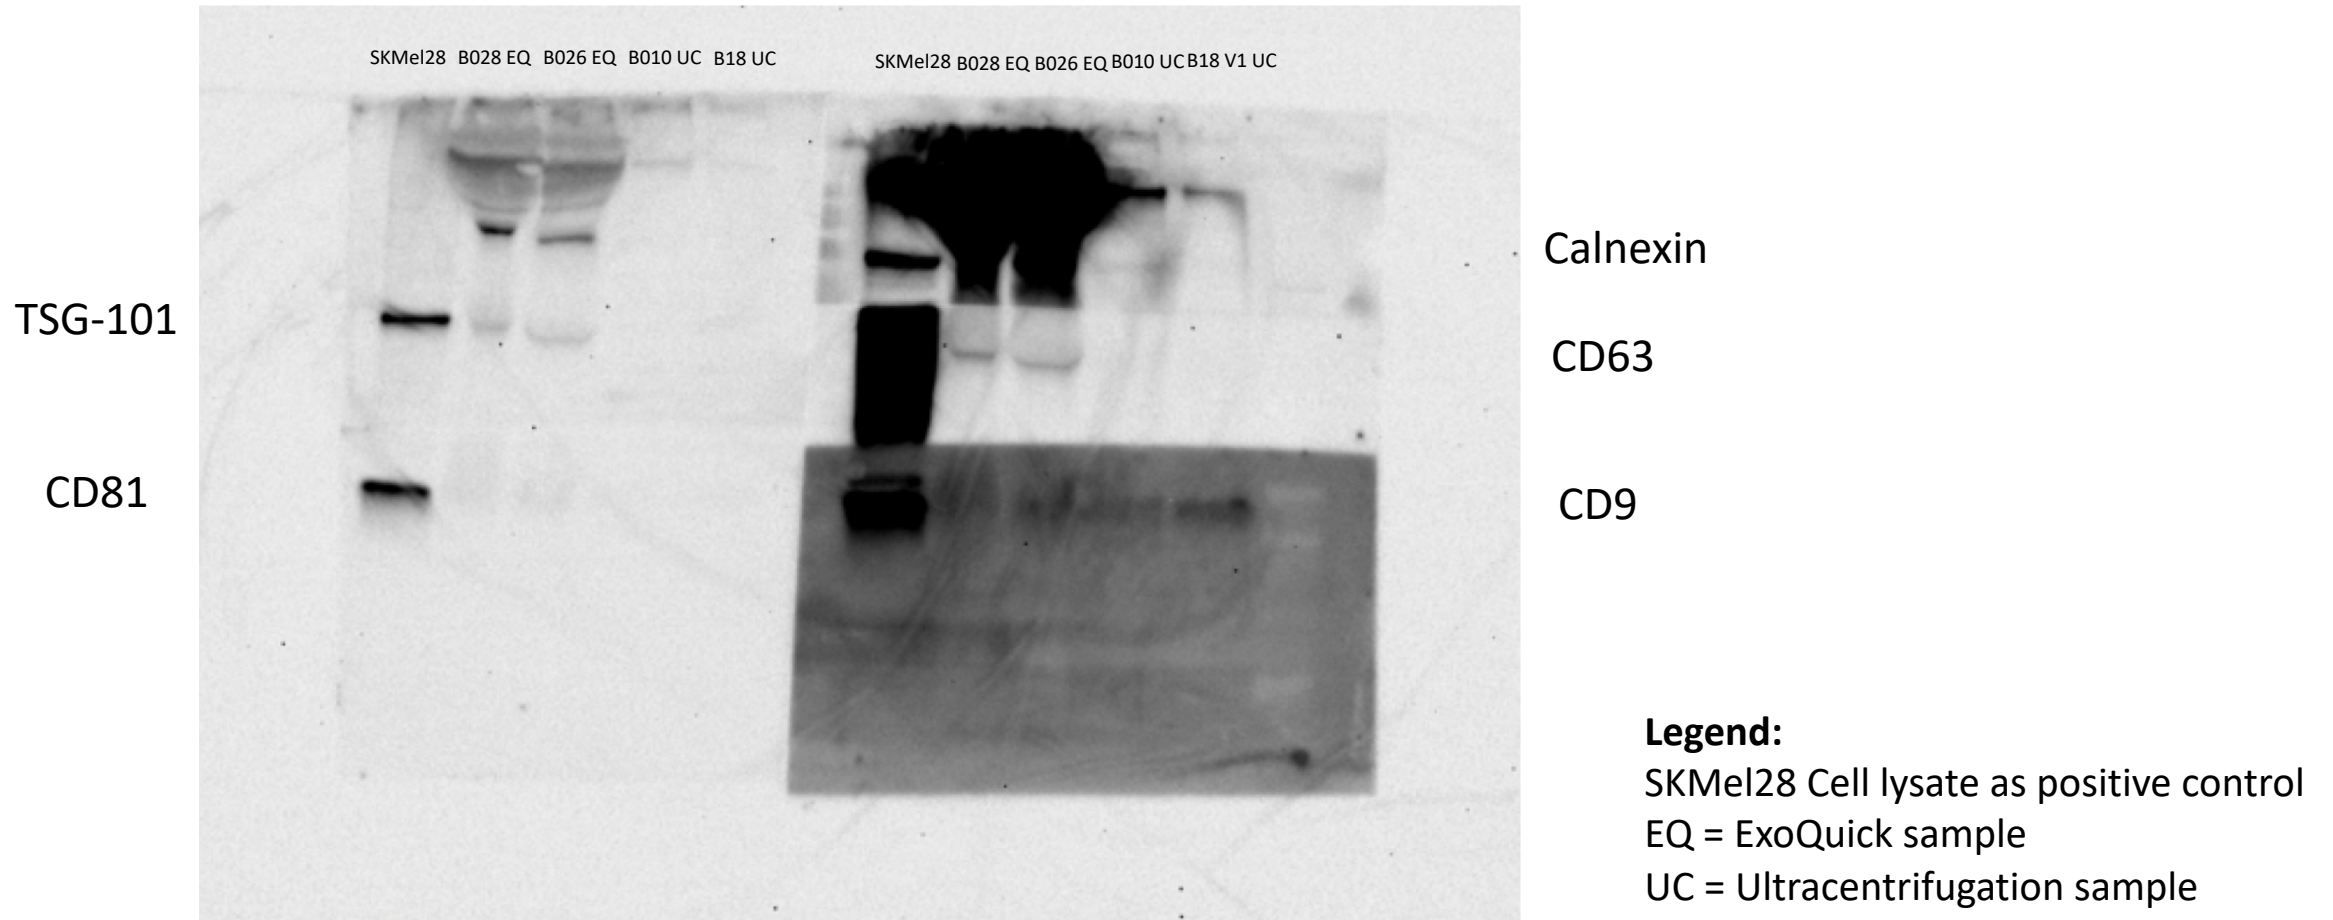

# Western blot gel: Exposure used for CD9, TSG101 and CD81

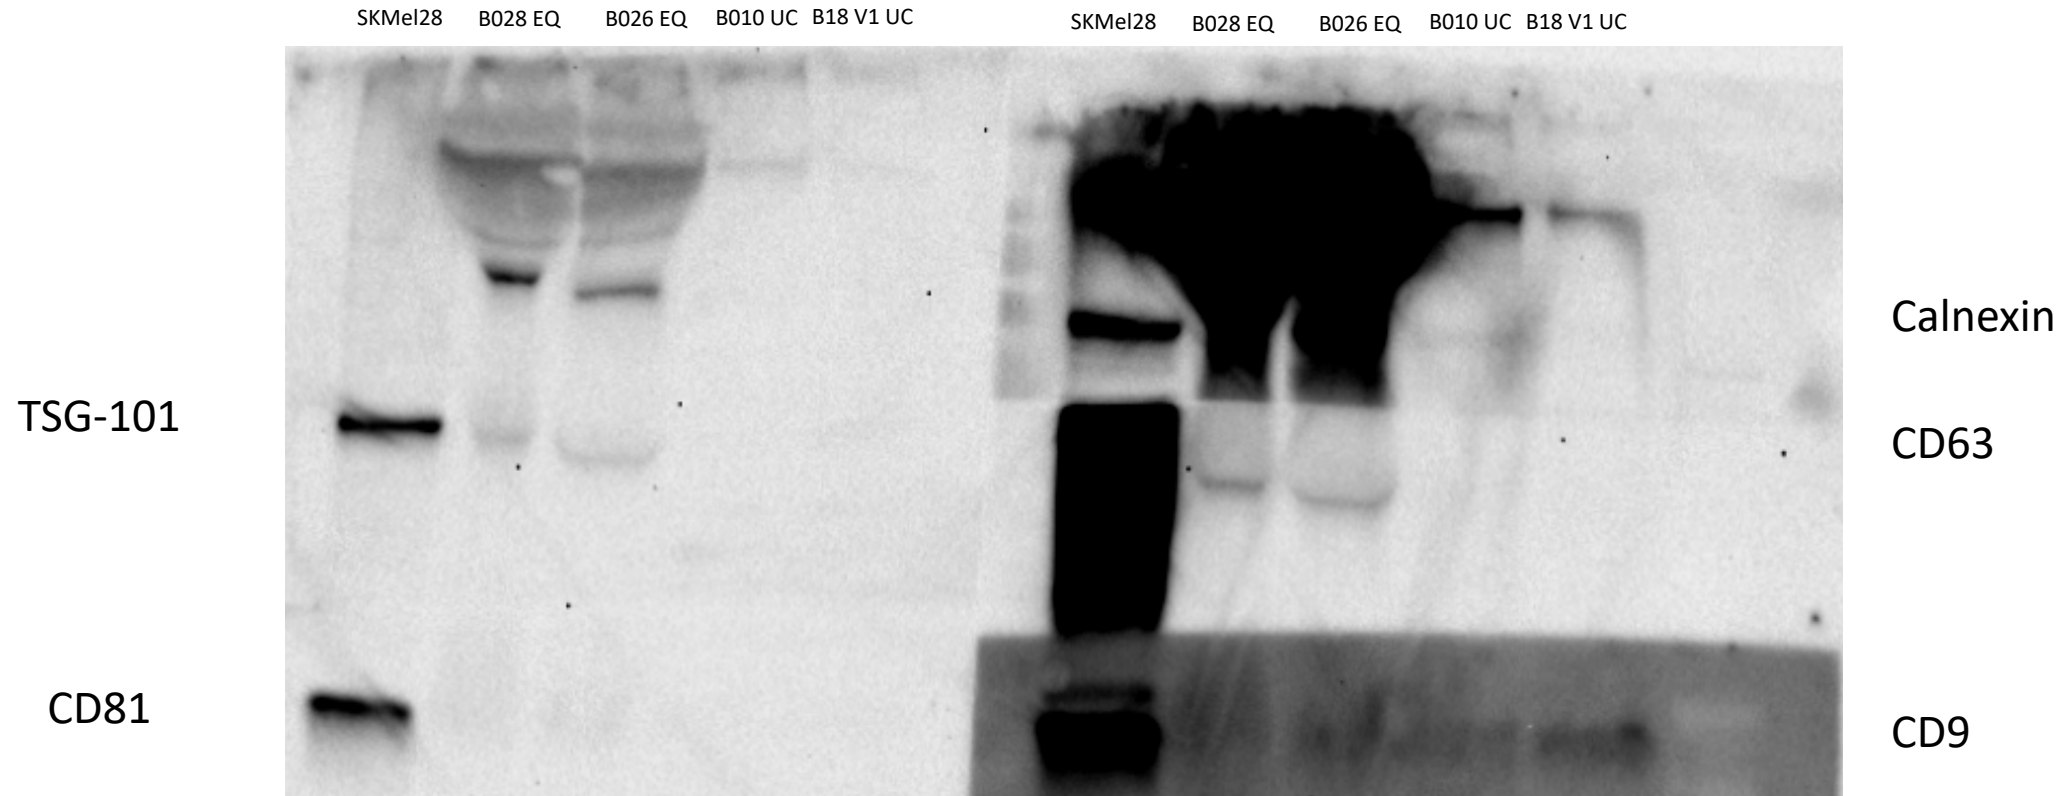

### Legend:

SKMel28 Cell lysate as positive control

EQ = ExoQuick sample

UC = Ultracentrifugation sample

# Western blot: Exposure used for CD63 and Calnexin (180S)

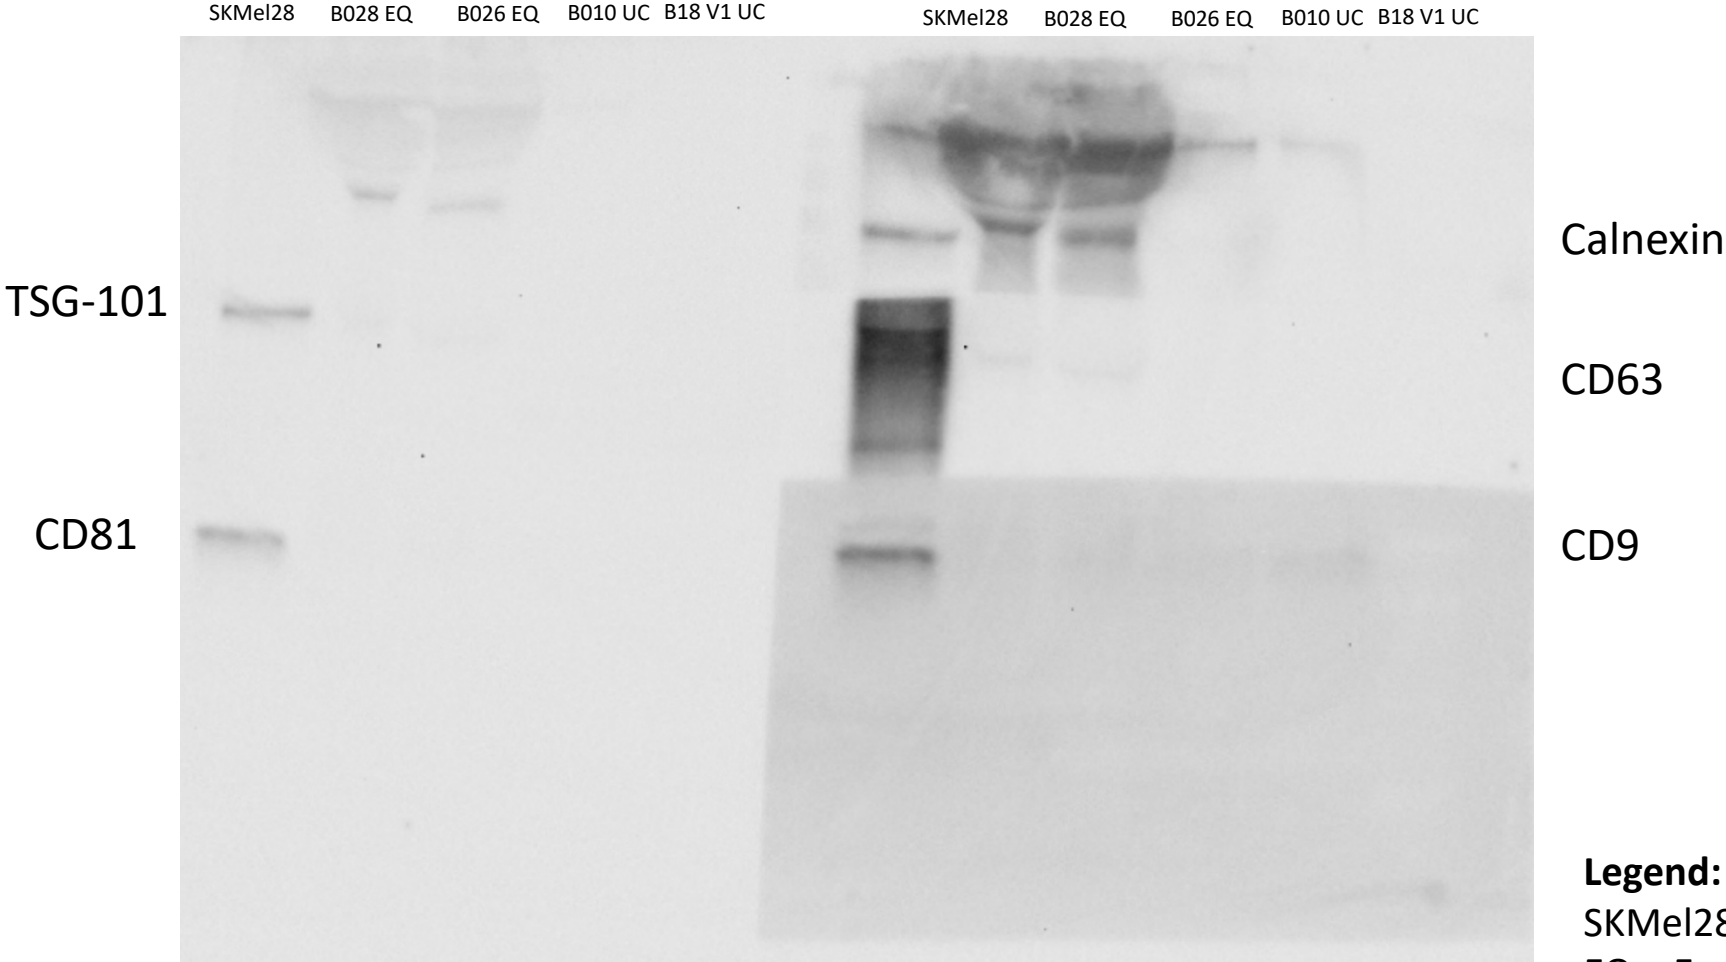

**Legend:**  
SKMel28 Cell lysate as positive control  
EQ = ExoQuick sample  
UC = Ultracentrifugation sample

## Western blot molecular weight ladders

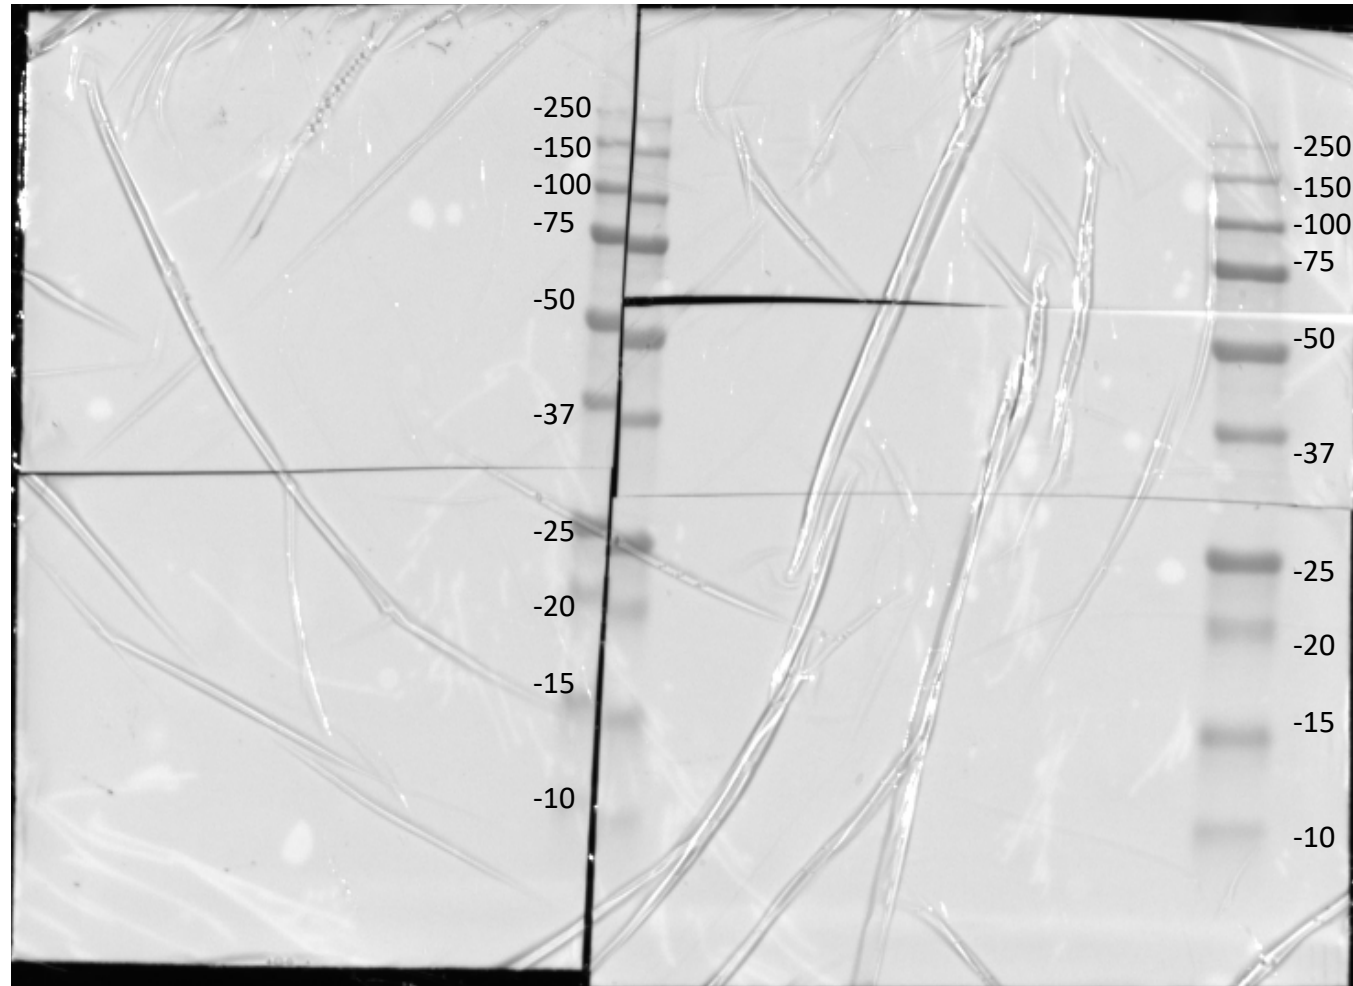

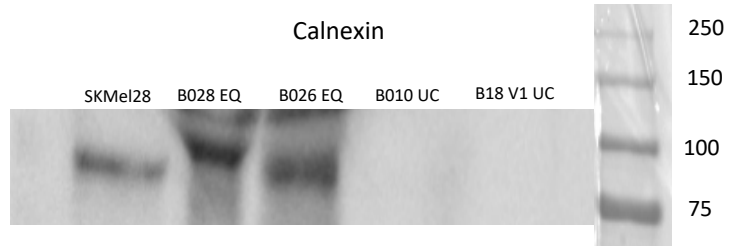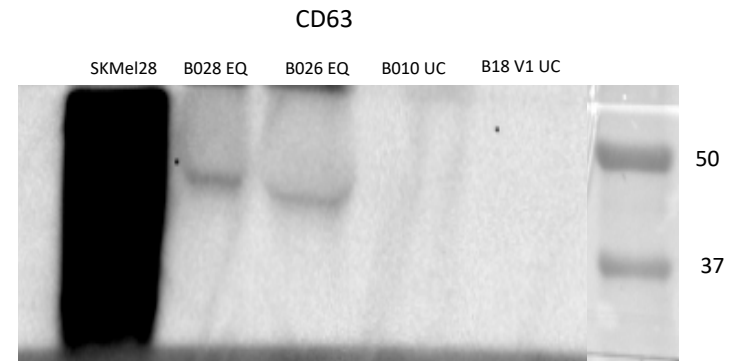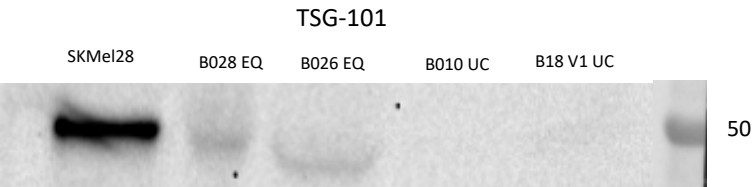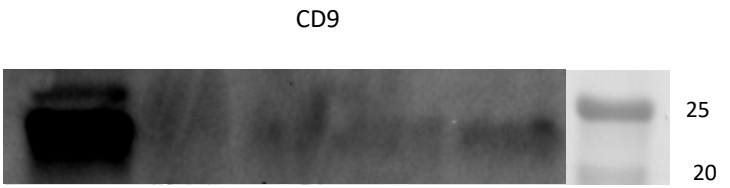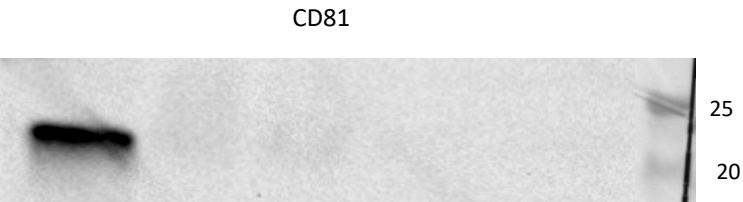

Summary of cropped results with ladder
